# Supplementary material for: On the Redox Equilibrium of TPP/TPPO Containing Cu(I) and Cu(II) Complexes
Source: MDPI journal article supplement (doi:10.3390/chemistry5020087), 2023-05-17
Supplement: s1 [file s1]

## Supporting Information

# On the redox equilibrium of TPP/TPPO containing Cu(I) and Cu(II) complexes

Stephanie Linda Faber, Nesrin Dilmen, and Sabine Becker

|      |                                                             |    |
|------|-------------------------------------------------------------|----|
| 1.   | Single Crystal X-Ray Diffraction                            | 2  |
| 1.1. | General Information                                         | 2  |
| 1.2. | Crystal and Refinement Data of <b>1c</b>                    | 2  |
| 1.3. | Crystal and Refinement Data of <b>2</b>                     | 4  |
| 1.4. | Crystal and Refinement Data of <b>2a</b>                    | 5  |
| 1.5. | Crystal and Refinement Data of <b>2a·2b</b>                 | 7  |
| 1.6. | Crystal and Refinement Data of <b>2c</b>                    | 8  |
| 1.7. | Crystal and Refinement Data of <b>3</b>                     | 9  |
| 1.8. | Crystal and Refinement Data of <b>CuCl·CH<sub>3</sub>CN</b> | 11 |
| 2.   | IR spectroscopy                                             | 13 |
| 2.1. | General Information                                         | 13 |
| 2.2. | IR spectrum of <b>1</b>                                     | 13 |
| 2.3. | IR spectrum of <b>1a</b>                                    | 14 |
| 2.4. | IR spectrum of <b>1b</b>                                    | 14 |
| 2.5. | IR spectrum of <b>1c</b>                                    | 15 |
| 2.6. | IR spectrum of <b>2</b>                                     | 15 |
| 2.7. | IR spectrum of <b>2a</b>                                    | 16 |
| 2.8. | IR spectrum of <b>3</b>                                     | 16 |
| 2.9. | Comparison of IR spectra                                    | 17 |
| 3.   | Elemental analyses and melting points                       | 21 |
| 3.1. | General Information                                         | 21 |
| 3.2. | Elemental analyses                                          | 21 |
| 3.3. | Melting points                                              | 21 |
| 4.   | References                                                  | 22 |

### 1. Single Crystal X-Ray Diffraction

#### 1.1. General Information

Single crystal X-ray diffraction studies were performed with suitable crystals of **1c**, **2**, **2a**, **2a·2b**, **2c**, **3**, and **CuCl·CH<sub>3</sub>CN**. A single crys-

tal was mounted on a MiTeGen Dual Thickness MicroMount™ with Fomblin Y oil and transferred to a N<sub>2</sub> cold stream (100 K) by an OXFORD CRYOSYSTEMS 700 low temperature system. Data were collected at low temperatures (100 K) using  $\varphi$ - and  $\omega$ -scans on a BRUKER D8 Venture system equipped with dual I $\mu$ S microfocus sources and a PHOTON100 detector. Mo-K $\alpha$  radiation with wavelength 0.71073 Å and a collimating Quazar multilayer mirror were used. Semi-empirical absorption corrections from equivalents were calculated with SADABS-2016/2 [1]. The space groups were determined using XPREP [2,3] through analysis of the Laue symmetry and systematic absences. The structures were solved with SHELXT [4] and refined by full-matrix least-squares based on  $F^2$  using SHELXL [5] and SHELXle [6] as a graphical interface. All structures were checked for a higher symmetry using PLATON [7]. All non-hydrogen atoms were located and refined anisotropically. Hydrogen atoms were assigned to idealized positions and given thermal parameters equal to 1.2 times the thermal displacement parameters of the atoms to which they were attached.

The cif files have been deposited with the Cambridge Structural Database (CSD). All determined parameters such as bond distances,  $U_{ij}$  components, etc. can be retrieved free of charge from the CSD (CCDC and CSD numbers: 2255472- 2255478). General refinement and structure details for the structures are given below.

## 1.2. Crystal and Refinement Data of 1c

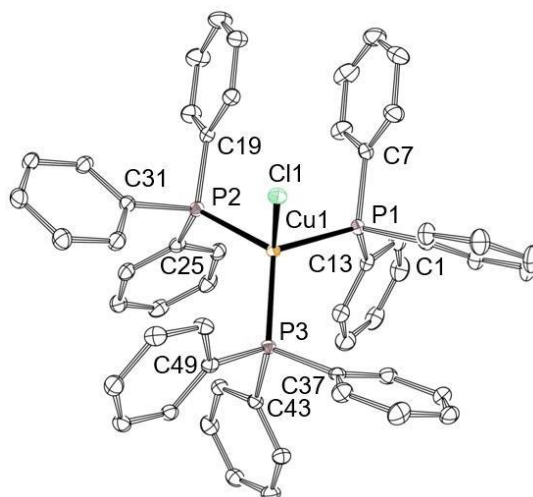

**Figure S1.** Molecular structure of 1c. Solvent acetone and hydrogen atoms omitted for clarity, ellipsoids set at 50 % probability.

**1c** crystallized in the triclinic space group  $\bar{P}1$  with one complex unit and two free acetone solvent molecules in the asymmetric unit.

**Table S1.** Crystal data and structure refinement for 1c.

|                                   |                                                                                                                              |
|-----------------------------------|------------------------------------------------------------------------------------------------------------------------------|
| CCDC Number                       | 2255472                                                                                                                      |
| Empirical formula                 | C <sub>60</sub> H <sub>57</sub> ClCuO <sub>2</sub> P <sub>3</sub>                                                            |
| Formula weight                    | 1001.95                                                                                                                      |
| Temperature                       | 100(2) K                                                                                                                     |
| Wavelength                        | 0.71073 Å                                                                                                                    |
| Crystal system                    | Triclinic                                                                                                                    |
| Space group                       | $\bar{P}1$                                                                                                                   |
| Unit cell dimensions              | a = 10.7077(6) Å $\alpha$ = 107.012(2)°<br>b = 12.8639(7) Å $\beta$ = 105.126(2)°<br>c = 20.0151(12) Å $\gamma$ = 91.042(2)° |
| Volume                            | 2531.6(3) Å <sup>3</sup>                                                                                                     |
| Z                                 | 2                                                                                                                            |
| Density (calculated)              | 1.314 Mg/m <sup>3</sup>                                                                                                      |
| Absorption coefficient            | 0.622 mm <sup>-1</sup>                                                                                                       |
| F(000)                            | 1048                                                                                                                         |
| Crystal size                      | 0.330 x 0.288 x 0.193 mm <sup>3</sup>                                                                                        |
| Theta range for data collection   | 1.664 to 29.575°                                                                                                             |
| Index ranges                      | -14 ≤ h ≤ 14, -17 ≤ k ≤ 17, -27 ≤ l ≤ 27                                                                                     |
| Reflections collected             | 116638                                                                                                                       |
| Independent reflections           | 14185 [R(int) = 0.0820]                                                                                                      |
| Completeness to theta = 25.242°   | 100.0 %                                                                                                                      |
| Absorption correction             | Semi-empirical from equivalents                                                                                              |
| Refinement method                 | Full-matrix least-squares on F <sup>2</sup>                                                                                  |
| Data / restraints / parameters    | 14185 / 0 / 608                                                                                                              |
| Goodness-of-fit on F <sup>2</sup> | 1.048                                                                                                                        |
| Final R indices [I > 2σ(I)]       | R1 = 0.0419, wR2 = 0.0834                                                                                                    |
| R indices (all data)              | R1 = 0.0731, wR2 = 0.0946                                                                                                    |
| Largest diff. peak and hole       | 0.490 and -0.460 e. Å <sup>-3</sup>                                                                                          |

**Table S2.** Selected bond lengths [Å] and angles [°] of **1c**.

|                  |             |                  |             |                  |             |
|------------------|-------------|------------------|-------------|------------------|-------------|
| Cu(1)-P(3)       | 2.3028(5)   | Cu(1)-P(2)       | 2.3092(5)   | Cu(1)-P(1)       | 2.3108(5)   |
| Cu(1)-Cl(1)      | 2.3426(5)   |                  |             |                  |             |
| P(3)-Cu(1)-P(2)  | 110.479(19) | P(3)-Cu(1)-P(1)  | 120.251(19) | P(2)-Cu(1)-P(1)  | 114.646(19) |
| P(3)-Cu(1)-Cl(1) | 102.418(18) | P(2)-Cu(1)-Cl(1) | 104.492(18) | P(1)-Cu(1)-Cl(1) | 101.997(18) |
| C(13)-P(1)-Cu(1) | 117.75(6)   | C(7)-P(1)-Cu(1)  | 112.99(6)   | C(1)-P(1)-Cu(1)  | 115.84(6)   |
| C(31)-P(2)-Cu(1) | 115.71(6)   | C(19)-P(2)-Cu(1) | 115.11(6)   | C(25)-P(2)-Cu(1) | 114.68(6)   |
| C(43)-P(3)-Cu(1) | 114.96(6)   | C(37)-P(3)-Cu(1) | 116.76(6)   | C(49)-P(3)-Cu(1) | 114.70(6)   |

### 1.3. Crystal and Refinement Data of **2**

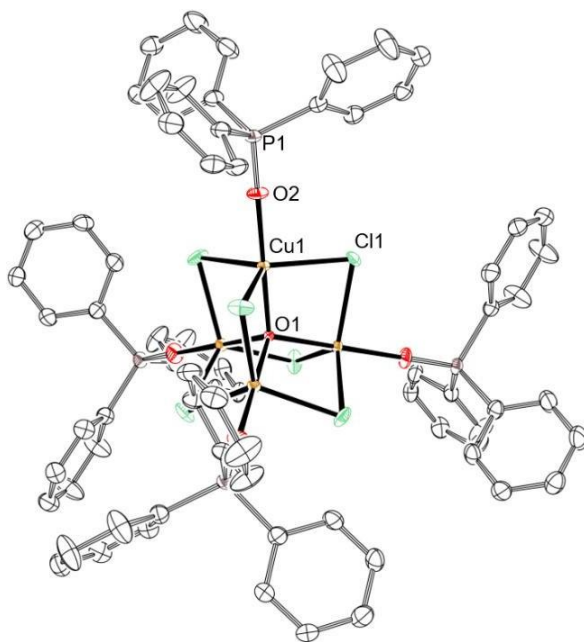

**Figure S2.** Molecular structure of **2**. H atoms not shown for clarity. Thermal ellipsoids set at the 50 % level.

**2** crystallizes in the cubic space group  $\bar{F}m\bar{3}c$  with  $\frac{1}{4}$  cluster fragment in the asymmetric unit.

**Table S3.** Crystal data and structure refinement for **2**.

|                                 |                                                                                                                           |
|---------------------------------|---------------------------------------------------------------------------------------------------------------------------|
| CCDC number                     | 2255477                                                                                                                   |
| Empirical formula               | $C_{72}H_{60}Cl_6Cu_4O_5P_4$                                                                                              |
| Formula weight                  | 1595.94                                                                                                                   |
| Temperature                     | 100(2) K                                                                                                                  |
| Wavelength                      | 0.71073 Å                                                                                                                 |
| Crystal system                  | Cubic                                                                                                                     |
| Space group                     | $\bar{F}m\bar{3}c$                                                                                                        |
| Unit cell dimensions            | $a = 24.2694(9)$ Å $\alpha = 90^\circ$<br>$b = 24.2694(9)$ Å $\beta = 90^\circ$<br>$c = 24.2694(9)$ Å $\gamma = 90^\circ$ |
| Volume                          | $14294.8(16)$ Å <sup>3</sup>                                                                                              |
| Z                               | 8                                                                                                                         |
| Density (calculated)            | 1.483 Mg/m <sup>3</sup>                                                                                                   |
| Absorption coefficient          | 1.537 mm <sup>-1</sup>                                                                                                    |
| $F(000)$                        | 6480                                                                                                                      |
| Crystal size                    | 0.704 × 0.468 × 0.124 mm <sup>3</sup>                                                                                     |
| Theta range for data collection | 1.678 to 29.515°                                                                                                          |
| Index ranges                    | $-33 \leq h \leq 24,$<br>$-33 \leq k \leq 29$<br>$-32 \leq l \leq 33$                                                     |

|                                      |                                    |
|--------------------------------------|------------------------------------|
| Reflections collected                | 34081                              |
| Independent reflections              | 1680 [R(int) = 0.0682]             |
| Completeness to theta = 25.242°      | 100.0 %                            |
| Absorption correction                | Semi-empirical from equivalents    |
| Max. and min. transmission           | 0.7466 and 0.4935                  |
| Refinement method                    | Full-matrix least-squares on $F^2$ |
| Data / restraints / parameters       | 1680 / 0 / 70                      |
| Goodness-of-fit on $F^2$             | 1.067                              |
| Final R indices [ $I > 2\sigma(I)$ ] | R1 = 0.0274, wR2 = 0.0628          |
| R indices (all data)                 | R1 = 0.0424, wR2 = 0.0688          |
| Absolute structure parameter         | 0.014(8)                           |
| Largest diff. peak and hole          | 0.411 and -0.383 e.Å <sup>-3</sup> |

**Table S4.** Selected bond lengths [Å] and angles [°] of **2**.

|                      |            |                      |           |                       |            |
|----------------------|------------|----------------------|-----------|-----------------------|------------|
| Cu(1)-O(1)           | 1.9042(5)  | Cu(1)-O(2)           | 1.928(4)  | Cu(1)-Cl(1)#1         | 2.3889(7)  |
| Cu(1)-Cl(1)#2        | 2.3889(7)  | Cu(1)-Cl(1)          | 2.3890(7) |                       |            |
| O(1)-Cu(1)-O(2)      | 180.00(7)  | O(1)-Cu(1)-Cl(1)#1   | 84.66(2)  | O(2)-Cu(1)-Cl(1)#1    | 95.34(2)   |
| O(1)-Cu(1)-Cl(1)#2   | 84.66(2)   | O(2)-Cu(1)-Cl(1)#2   | 95.34(2)  | Cl(1)#1-Cu(1)-Cl(1)#2 | 119.144(6) |
| O(1)-Cu(1)-Cl(1)     | 84.66(2)   | O(2)-Cu(1)-Cl(1)     | 95.34(2)  | Cl(1)#1-Cu(1)-Cl(1)   | 119.145(6) |
| Cl(1)#2-Cu(1)-Cl(1)  | 119.145(6) | Cu(1)#3-Cl(1)-Cu(1)  | 81.20(4)  | Cu(1)#3-O(1)-Cu(1)#4  | 109.5      |
| Cu(1)#3-O(1)-Cu(1)#5 | 109.5      | Cu(1)#4-O(1)-Cu(1)#5 | 109.5     | Cu(1)#3-O(1)-Cu(1)    | 109.5      |
| Cu(1)#4-O(1)-Cu(1)   | 109.5      | Cu(1)#5-O(1)-Cu(1)   | 109.5     | P(1)-O(2)-Cu(1)       | 180.0(4)   |

#### 1.4. Crystal and Refinement Data of **2a**

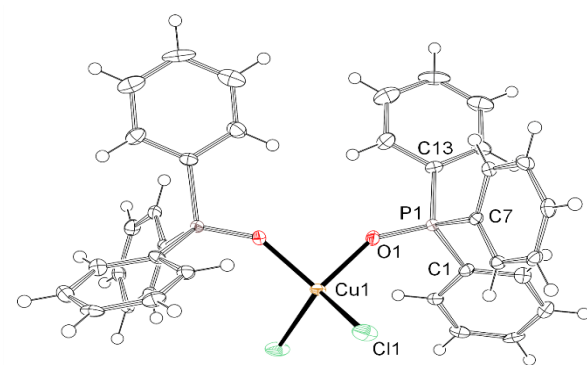

**Figure S3.** Molecular structure of **2a**. Thermal ellipsoids set at the 50 % level.

**2a** crystallized in the orthorhombic space group  $Fdd2$  with half a complex molecule in the asymmetric unit.

**Table S5.** Crystal data and structure refinement for **2a**.

|                                          |                                                                                         |
|------------------------------------------|-----------------------------------------------------------------------------------------|
| CCDC Number                              | 2255473                                                                                 |
| Empirical formula                        | C <sub>36</sub> H <sub>30</sub> Cl <sub>2</sub> CuO <sub>2</sub> P <sub>2</sub>         |
| Formula weight                           | 690.98                                                                                  |
| Temperature                              | 100(2) K                                                                                |
| Wavelength                               | 0.71073 Å                                                                               |
| Crystal system                           | Orthorhombic                                                                            |
| Space group                              | <i>Fdd2</i>                                                                             |
| Unit cell dimensions                     | a = 20.904(2) Å    α = 90°<br>b = 31.157(4) Å    β = 90°<br>c = 9.8100(12) Å    γ = 90° |
| Volume                                   | 6389.3(13) Å <sup>3</sup>                                                               |
| Z                                        | 8                                                                                       |
| Density (calculated)                     | 1.437 Mg/m <sup>3</sup>                                                                 |
| Absorption coefficient                   | 0.983 mm <sup>-1</sup>                                                                  |
| <i>F</i> (000)                           | 2840                                                                                    |
| Crystal size                             | 0.916 x 0.125 x 0.120 mm <sup>3</sup>                                                   |
| Theta range for data collection          | 2.347 to 27.485°                                                                        |
| Index ranges                             | -24 ≤ h ≤ 27<br>-40 ≤ k ≤ 40<br>-12 ≤ l ≤ 12                                            |
| Reflections collected                    | 19266                                                                                   |
| Independent reflections                  | 3669 [R(int) = 0.0698]                                                                  |
| Completeness to theta = 25.242°          | 100.0 %                                                                                 |
| Absorption correction                    | Semi-empirical from equivalents                                                         |
| Refinement method                        | Full-matrix least-squares on <i>F</i> <sup>2</sup>                                      |
| Data / restraints / parameters           | 3669 / 1 / 196                                                                          |
| Goodness-of-fit on <i>F</i> <sup>2</sup> | 1.049                                                                                   |
| Final R indices [I > 2σ(I)]              | R1 = 0.0356, wR2 = 0.0750                                                               |
| R indices (all data)                     | R1 = 0.0452, wR2 = 0.0790                                                               |
| Absolute structure parameter             | 0.022(18)                                                                               |
| Largest diff. peak and hole              | 0.329 and -0.353 e. Å <sup>-3</sup>                                                     |

**Table S6.** Selected bond lengths [Å] and angles [°] for **2a**.

|                    |            |                      |           |                     |            |
|--------------------|------------|----------------------|-----------|---------------------|------------|
| Cu(1)-O(1)#1       | 1.971(3)   | Cu(1)-O(1)           | 1.972(3)  | Cu(1)-Cl(1)#1       | 2.1775(11) |
| Cu(1)-Cl(1)        | 2.1775(11) |                      |           |                     |            |
| O(1)#1-Cu(1)-O(1)  | 89.21(15)  | O(1)#1-Cu(1)-Cl(1)#1 | 135.45(8) | O(1)-Cu(1)-Cl(1)#1  | 101.02(8)  |
| O(1)#1-Cu(1)-Cl(1) | 101.02(8)  | O(1)-Cu(1)-Cl(1)     | 135.45(8) | Cl(1)#1-Cu(1)-Cl(1) | 101.20(6)  |
| P(1)-O(1)-Cu(1)    | 147.14(18) |                      |           |                     |            |

### 1.5. Crystal and Refinement Data of **2a·2b**

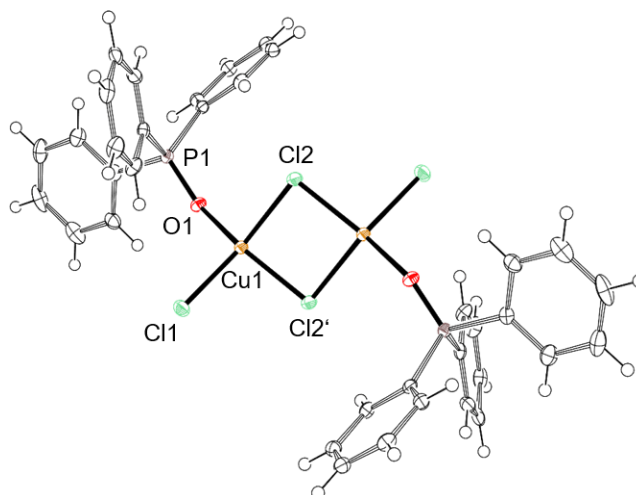

**Figure S4.** Molecular structure of **2b**. **2a** not shown for clarity. Thermal ellipsoids set at the 50 % level.

**2a·2b** crystallized in the monoclinic space group  $P2_1/c$  with each half a complex molecule of **2a** and **2b** in the asymmetric unit.

**Table S7.** Crystal data and structure refinement for **2a·2b**.

|                                 |                                                                                                                                 |
|---------------------------------|---------------------------------------------------------------------------------------------------------------------------------|
| CCDC Number                     | 2255474                                                                                                                         |
| Empirical formula               | $C_{54}H_{45}Cl_4Cu_2O_3P_3$                                                                                                    |
| Formula weight                  | 1103.69                                                                                                                         |
| Temperature                     | 100(2) K                                                                                                                        |
| Wavelength                      | 0.71073 Å                                                                                                                       |
| Crystal system                  | Monoclinic                                                                                                                      |
| Space group                     | $P2_1/c$                                                                                                                        |
| Unit cell dimensions            | $a = 9.7008(8)$ Å $\alpha = 90^\circ$<br>$b = 48.974(4)$ Å $\beta = 114.485(3)^\circ$<br>$c = 11.4192(8)$ Å $\gamma = 90^\circ$ |
| Volume                          | $4937.2(7)$ Å <sup>3</sup>                                                                                                      |
| Z                               | 4                                                                                                                               |
| Density (calculated)            | 1.485 Mg/m <sup>3</sup>                                                                                                         |
| Absorption coefficient          | 1.219 mm <sup>-1</sup>                                                                                                          |
| $F(000)$                        | 2256                                                                                                                            |
| Crystal size                    | 0.154 x 0.098 x 0.029 mm <sup>3</sup>                                                                                           |
| Theta range for data collection | 1.663 to 27.100°                                                                                                                |
| Index ranges                    | -12 ≤ h ≤ 12, -62 ≤ k ≤ 62, -14 ≤ l ≤ 14                                                                                        |
| Reflections collected           | 75466                                                                                                                           |
| Independent reflections         | 10915 [R(int) = 0.0990]                                                                                                         |
| Completeness to theta = 25.242° | 100.0 %                                                                                                                         |
| Absorption correction           | Semi-empirical from equivalents                                                                                                 |
| Refinement method               | Full-matrix least-squares on $F^2$                                                                                              |
| Data / restraints / parameters  | 10915 / 0 / 595                                                                                                                 |
| Goodness-of-fit on $F^2$        | 1.031                                                                                                                           |
| Final R indices [I > 2σ(I)]     | R1 = 0.0401, wR2 = 0.0813                                                                                                       |
| R indices (all data)            | R1 = 0.0738, wR2 = 0.0945                                                                                                       |
| Largest diff. peak and hole     | 0.454 and -0.656 e.Å <sup>-3</sup>                                                                                              |

**Table S8.** Selected bond lengths [Å] and angles [°] for **2b**.

|               |            |             |           |             |           |
|---------------|------------|-------------|-----------|-------------|-----------|
| Cu(1)-O(1)    | 1.9133(19) | Cu(1)-Cl(1) | 2.1977(8) | Cu(1)-Cl(2) | 2.2684(8) |
| Cu(1)-Cl(2)#1 | 2.2877(8)  |             |           |             |           |

|                     |          |                     |           |                     |            |
|---------------------|----------|---------------------|-----------|---------------------|------------|
| O(1)-Cu(1)-Cl(1)    | 94.27(6) | O(1)-Cu(1)-Cl(2)    | 155.22(6) | Cl(1)-Cu(1)-Cl(2)   | 94.94(3)   |
| O(1)-Cu(1)-Cl(2)#1  | 94.75(6) | O(1)-Cu(1)-Cl(2)#1  | 94.75(6)  | Cl(1)-Cu(1)-Cl(2)#1 | 154.14(3)  |
| Cl(2)-Cu(1)-Cl(2)#1 | 86.81(3) | Cu(1)-Cl(2)-Cu(1)#1 | 93.19(3)  | P(1)-O(1)-Cu(1)     | 148.09(13) |

## 1.6. Crystal and Refinement Data of 2c

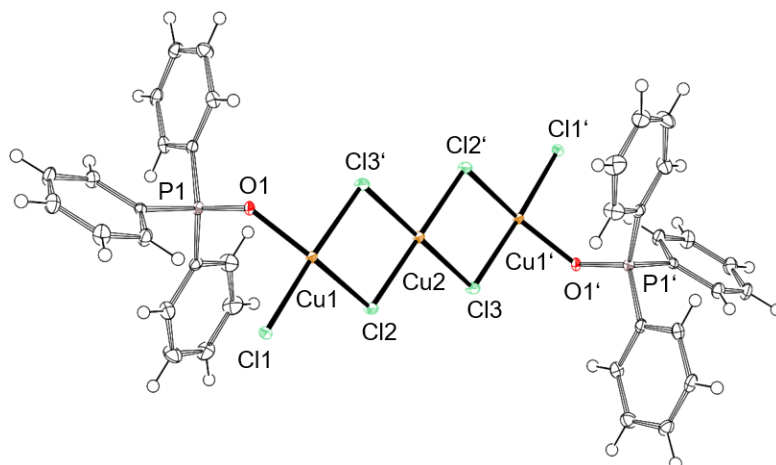

Figure S5. Molecular structure of 2c. Thermal ellipsoids set at the 50 % level.

2c crystallized in the monoclinic space group  $P2_1/n$  with half a complex molecule in the asymmetric unit.

Table S9. Crystal data and structure refinement for 2c.

|                                 |                                                                                                                                    |
|---------------------------------|------------------------------------------------------------------------------------------------------------------------------------|
| CCDC Number                     | 2255475                                                                                                                            |
| Empirical formula               | $C_{36}H_{30}Cl_6Cu_3O_2P_2$                                                                                                       |
| Formula weight                  | 959.86                                                                                                                             |
| Temperature                     | 100(2) K                                                                                                                           |
| Wavelength                      | 0.71073 Å                                                                                                                          |
| Crystal system                  | Monoclinic                                                                                                                         |
| Space group                     | $P2_1/n$                                                                                                                           |
| Unit cell dimensions            | $a = 9.2654(3)$ Å $\alpha = 90^\circ$<br>$b = 21.0901(7)$ Å $\beta = 104.0830(10)^\circ$<br>$c = 10.0078(4)$ Å $\gamma = 90^\circ$ |
| Volume                          | $1896.83(12)$ Å <sup>3</sup>                                                                                                       |
| Z                               | 2                                                                                                                                  |
| Density (calculated)            | 1.681 Mg/m <sup>3</sup>                                                                                                            |
| Absorption coefficient          | 2.206 mm <sup>-1</sup>                                                                                                             |
| $F(000)$                        | 962                                                                                                                                |
| Crystal size                    | 0.182 x 0.092 x 0.085 mm <sup>3</sup>                                                                                              |
| Theta range for data collection | 1.931 to 27.484°                                                                                                                   |
| Index ranges                    | -12 ≤ h ≤ 11, -27 ≤ k ≤ 27, -12 ≤ l ≤ 12                                                                                           |
| Reflections collected           | 31477                                                                                                                              |
| Independent reflections         | 4344 [R(int) = 0.0658]                                                                                                             |
| Completeness to theta = 25.242° | 100.0 %                                                                                                                            |
| Absorption correction           | Semi-empirical from equivalents                                                                                                    |
| Refinement method               | Full-matrix least-squares on $F^2$                                                                                                 |
| Data / restraints / parameters  | 4344 / 0 / 223                                                                                                                     |
| Goodness-of-fit on $F^2$        | 1.043                                                                                                                              |
| Final R indices [I > 2σ(I)]     | R1 = 0.0301, wR2 = 0.0578                                                                                                          |



|                             |                                    |
|-----------------------------|------------------------------------|
| R indices (all data)        | R1 = 0.0492, wR2 = 0.0642          |
| Extinction coefficient      | n/a                                |
| Largest diff. peak and hole | 0.540 and -0.455 e.Å <sup>-3</sup> |

**Table S10.** Selected bond lengths [Å] and angles [°] for **2c**.

|                       |            |                     |            |                       |           |
|-----------------------|------------|---------------------|------------|-----------------------|-----------|
| Cu(1)-O(1)            | 1.9485(17) | Cu(1)-Cl(1)         | 2.2618(6)  | Cu(1)-Cl(2)           | 2.3269(6) |
| Cu(1)-Cl(3)#1         | 2.3288(7)  | Cu(1)-Cl(1)#2       | 2.5490(7)  | Cu(2)-Cl(3)#1         | 2.2501(6) |
| Cu(2)-Cl(3)           | 2.2501(6)  | Cu(2)-Cl(2)#1       | 2.2535(6)  | Cu(2)-Cl(2)           | 2.2535(6) |
| O(1)-Cu(1)-Cl(1)      | 94.46(5)   | O(1)-Cu(1)-Cl(2)    | 149.17(6)  | Cl(1)-Cu(1)-Cl(2)     | 93.83(2)  |
| O(1)-Cu(1)-Cl(3)#1    | 88.51(5)   | Cl(1)-Cu(1)-Cl(3)#1 | 177.00(3)  | Cl(2)-Cu(1)-Cl(3)#1   | 83.41(2)  |
| O(1)-Cu(1)-Cl(1)#2    | 102.78(5)  | Cl(1)-Cu(1)-Cl(1)#2 | 87.75(2)   | Cl(2)-Cu(1)-Cl(1)#2   | 107.18(2) |
| Cl(3)#1-Cu(1)-Cl(1)#2 | 91.96(2)   | Cl(3)#1-Cu(2)-Cl(3) | 180.00(2)  | Cl(3)#1-Cu(2)-Cl(2)#1 | 93.10(2)  |
| Cl(3)-Cu(2)-Cl(2)#1   | 86.90(2)   | Cl(3)#1-Cu(2)-Cl(2) | 86.90(2)   | Cl(3)-Cu(2)-Cl(2)     | 93.10(2)  |
| Cl(2)#1-Cu(2)-Cl(2)   | 180.00(3)  | Cu(1)-Cl(1)-Cu(1)#2 | 92.25(2)   | Cu(2)-Cl(2)-Cu(1)     | 94.76(2)  |
| Cu(2)-Cl(3)-Cu(1)#1   | 94.80(2)   | P(1)-O(1)-Cu(1)     | 132.48(11) |                       |           |

### 1.7. Crystal and Refinement Data of **3**

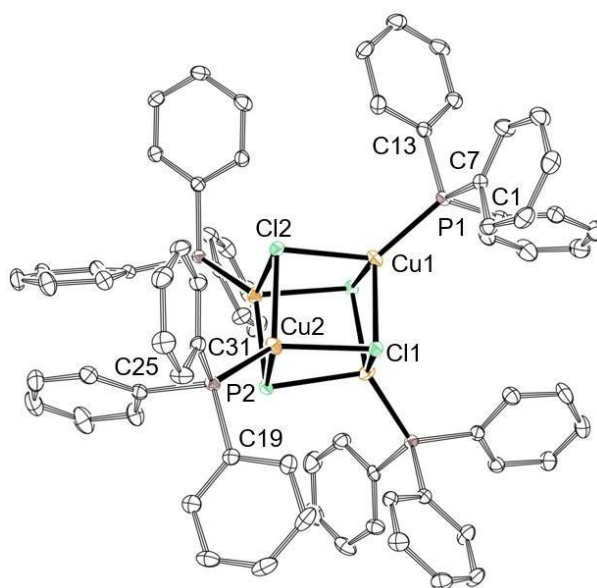

**Figure S6.** Molecular structure of **3**. H atoms omitted for clarity. Thermal ellipsoids set at the 50 % level.

**3** crystallized in the orthorhombic space group *Pbcn* with half a complex molecule in the asymmetric unit.

**Table S11.** Crystal data and structure refinement for **3**.

|                                   |                                                                                              |
|-----------------------------------|----------------------------------------------------------------------------------------------|
| CCDC Number                       | 2255476                                                                                      |
| Empirical formula                 | C <sub>72</sub> H <sub>60</sub> Cl <sub>4</sub> Cu <sub>4</sub> P <sub>4</sub>               |
| Formula weight                    | 1445.04                                                                                      |
| Temperature                       | 100(2) K                                                                                     |
| Wavelength                        | 0.71073 Å                                                                                    |
| Crystal system                    | Orthorhombic                                                                                 |
| Space group                       | <i>Pbcn</i>                                                                                  |
| Unit cell dimensions              | a = 17.3025(12) Å    α = 90°<br>b = 20.2602(13) Å    β = 90°<br>c = 18.0032(11) Å    γ = 90° |
| Volume                            | 6311.1(7) Å <sup>3</sup>                                                                     |
| Z                                 | 4                                                                                            |
| Density (calculated)              | 1.521 Mg/m <sup>3</sup>                                                                      |
| Absorption coefficient            | 1.644 mm <sup>-1</sup>                                                                       |
| F(000)                            | 2944                                                                                         |
| Crystal size                      | 0.288 × 0.260 × 0.182 mm <sup>3</sup>                                                        |
| Theta range for data collection   | 1.917 to 28.700°                                                                             |
| Index ranges                      | -23 ≤ h ≤ 23, -27 ≤ k ≤ 27, -24 ≤ l ≤ 24                                                     |
| Reflections collected             | 97544                                                                                        |
| Independent reflections           | 8165 [R(int) = 0.0829]                                                                       |
| Completeness to theta = 25.242°   | 100.0 %                                                                                      |
| Absorption correction             | Semi-empirical from equivalents                                                              |
| Refinement method                 | Full-matrix least-squares on F <sup>2</sup>                                                  |
| Data / restraints / parameters    | 8165 / 0 / 379                                                                               |
| Goodness-of-fit on F <sup>2</sup> | 1.018                                                                                        |
| Final R indices [I > 2σ(I)]       | R1 = 0.0343, wR2 = 0.0717                                                                    |
| R indices (all data)              | R1 = 0.0553, wR2 = 0.0801                                                                    |
| Largest diff. peak and hole       | 0.435 and -0.550 e.Å <sup>-3</sup>                                                           |

**Table S12.** Selected bond lengths [Å] and angles [°] for **3**.

|                     |            |                     |            |                     |            |
|---------------------|------------|---------------------|------------|---------------------|------------|
| Cu(1)-P(1)          | 2.1924(6)  | Cu(1)-Cl(2)         | 2.3515(6)  | Cu(1)-Cl(1)         | 2.4319(6)  |
| Cu(1)-Cl(2)#1       | 2.5041(6)  | Cu(2)-P(2)          | 2.1896(6)  | Cu(2)-Cl(1)         | 2.3992(6)  |
| Cu(2)-Cl(1)#1       | 2.4098(6)  | Cu(2)-Cl(2)         | 2.4747(6)  |                     |            |
| P(1)-Cu(1)-Cl(2)    | 130.39(2)  | P(1)-Cu(1)-Cl(1)    | 118.43(2)  | Cl(2)-Cu(1)-Cl(1)   | 101.71(2)  |
| P(1)-Cu(1)-Cl(2)#1  | 115.06(2)  | Cl(2)-Cu(1)-Cl(2)#1 | 91.27(2)   | Cl(1)-Cu(1)-Cl(2)#1 | 90.083(19) |
| P(2)-Cu(2)-Cl(1)    | 124.74(2)  | P(2)-Cu(2)-Cl(1)#1  | 131.31(2)  | Cl(1)-Cu(2)-Cl(1)#1 | 89.22(2)   |
| P(2)-Cu(2)-Cl(2)    | 112.92(2)  | Cl(1)-Cu(2)-Cl(2)   | 99.13(2)   | Cl(1)#1-Cu(2)-Cl(2) | 91.30(2)   |
| Cu(2)-Cl(1)-Cu(2)#1 | 89.95(2)   | Cu(2)-Cl(1)-Cu(1)   | 78.897(18) | Cu(2)#1-Cl(1)-Cu(1) | 89.941(19) |
| Cu(1)-Cl(2)-Cu(2)   | 78.949(18) | Cu(1)-Cl(2)-Cu(1)#1 | 87.429(19) | Cu(2)-Cl(2)-Cu(1)#1 | 86.828(18) |
| C(13)-P(1)-Cu(1)    | 120.64(7)  | C(7)-P(1)-Cu(1)     | 111.16(7)  | C(1)-P(1)-Cu(1)     | 113.07(7)  |
| C(25)-P(2)-Cu(2)    | 114.48(7)  | C(31)-P(2)-Cu(2)    | 118.52(8)  | C(19)-P(2)-Cu(2)    | 114.55(7)  |

## 1.8. Crystal and Refinement Data of **CuCl·CH<sub>3</sub>CN**

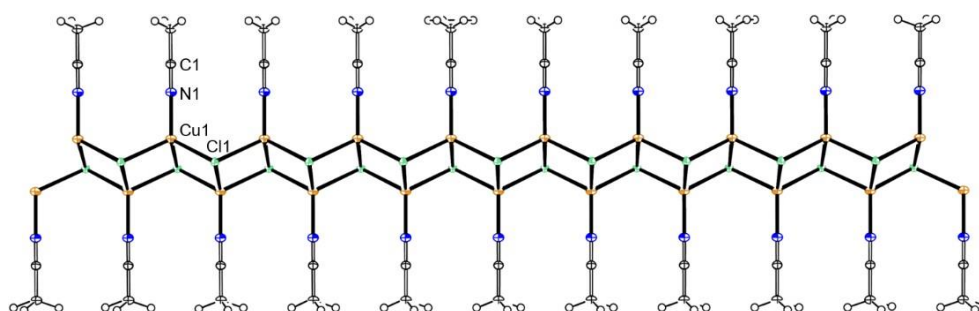

**Figure S7.** Molecular structure of **CuCl·CH<sub>3</sub>CN**. Thermal ellipsoids set at the 50 % level.

**CuCl·CH<sub>3</sub>CN** crystallized in the orthorhombic space group *Pnma* with one formula unit **CuCl·CH<sub>3</sub>CN** in the asymmetric unit.

**Table S13.** Crystal data and structure refinement for **CuCl·CH<sub>3</sub>CN**.

|                                          |                                                                                                                                                 |
|------------------------------------------|-------------------------------------------------------------------------------------------------------------------------------------------------|
| CCDC Number                              | 2255478                                                                                                                                         |
| Empirical formula                        | C <sub>2</sub> H <sub>3</sub> ClCuN                                                                                                             |
| Formula weight                           | 140.04                                                                                                                                          |
| Temperature                              | 103(2) K                                                                                                                                        |
| Wavelength                               | 0.71073 Å                                                                                                                                       |
| Crystal system                           | Orthorhombic                                                                                                                                    |
| Space group                              | <i>Pnma</i>                                                                                                                                     |
| Unit cell dimensions                     | $a = 8.5426(5) \text{ Å}$ $\alpha = 90^\circ$<br>$b = 3.8471(2) \text{ Å}$ $\beta = 90^\circ$<br>$c = 12.5341(7) \text{ Å}$ $\gamma = 90^\circ$ |
| Volume                                   | 411.92(4) Å <sup>3</sup>                                                                                                                        |
| Z                                        | 4                                                                                                                                               |
| Density (calculated)                     | 2.258 Mg/m <sup>3</sup>                                                                                                                         |
| Absorption coefficient                   | 5.732 mm <sup>-1</sup>                                                                                                                          |
| <i>F</i> (000)                           | 272                                                                                                                                             |
| Crystal size                             | 0.871 × 0.543 × 0.054 mm <sup>3</sup>                                                                                                           |
| Theta range for data collection          | 2.886 to 40.210°                                                                                                                                |
| Index ranges                             | -15 ≤ <i>h</i> ≤ 15, -6 ≤ <i>k</i> ≤ 6, -22 ≤ <i>l</i> ≤ 22                                                                                     |
| Reflections collected                    | 12539                                                                                                                                           |
| Independent reflections                  | 1421 [R(int) = 0.0648]                                                                                                                          |
| Completeness to theta = 25.242°          | 99.3 %                                                                                                                                          |
| Absorption correction                    | Semi-empirical from equivalents                                                                                                                 |
| Refinement method                        | Full-matrix least-squares on <i>F</i> <sup>2</sup>                                                                                              |
| Data / restraints / parameters           | 1421 / 0 / 33                                                                                                                                   |
| Goodness-of-fit on <i>F</i> <sup>2</sup> | 1.068                                                                                                                                           |
| Final R indices [I > 2σ(I)]              | R1 = 0.0275, wR2 = 0.0678                                                                                                                       |
| R indices (all data)                     | R1 = 0.0340, wR2 = 0.0715                                                                                                                       |
| Extinction coefficient                   | 0.056(4)                                                                                                                                        |
| Largest diff. peak and hole              | 0.951 and -1.448 e.Å <sup>-3</sup>                                                                                                              |

**Table S14.** Selected bond lengths [Å] and angles [°] for **CuCl·CH<sub>3</sub>CN**.

|                     |             |                       |             |                       |             |
|---------------------|-------------|-----------------------|-------------|-----------------------|-------------|
| Cu(1)-N(1)          | 1.9267(13)  | Cu(1)-Cl(1)           | 2.3896(2)   | Cu(1)-Cl(1)#1         | 2.3896(2)   |
| Cu(1)-Cl(1)#2       | 2.4004(4)   |                       |             |                       |             |
| N(1)-Cu(1)-Cl(1)    | 113.57(2)   | N(1)-Cu(1)-Cl(1)#1    | 113.57(2)   | Cl(1)-Cu(1)-Cl(1)#1   | 107.212(15) |
| N(1)-Cu(1)-Cl(1)#2  | 119.83(4)   | Cl(1)-Cu(1)-Cl(1)#2   | 100.448(10) | Cl(1)#1-Cu(1)-Cl(1)#2 | 100.447(10) |
| Cu(1)#3-Cl(1)-Cu(1) | 107.213(15) | Cu(1)#3-Cl(1)-Cu(1)#2 | 79.552(10)  | Cu(1)-Cl(1)-Cu(1)#2   | 79.552(10)  |
| C(1)-N(1)-Cu(1)     | 175.37(13)  |                       |             |                       |             |

## 2. IR spectroscopy

### 2.1. General Information

All samples were measured on a device of the type Jasco FT/IR-6000. If not mentioned otherwise all samples were measured as KBr pellets at room temperature.

### 2.2. IR spectrum of 1

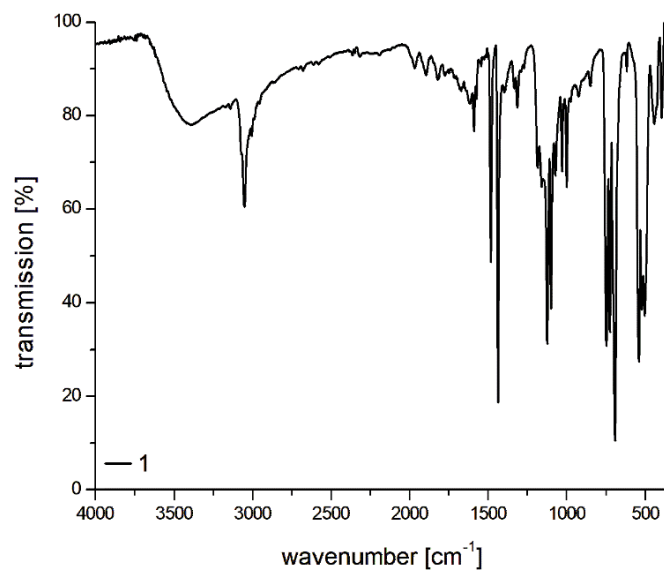

**Figure S8.** IR spectrum of **1** ( $c = 2.92 \cdot 10^{-5}$  mol/g(KBr)).  $\tilde{\nu} = 3050$  [ $\nu\text{C-H}_{\text{arom.}}$ ], 1480-1433 [ $\nu\text{C-C}_{\text{arom.}}$ ], 1121-1095 [ $\nu\text{C-H}_{\text{arom.}}$ ], 1027-996 [phenyl breathing mode], 747-725, 693 [ $\delta\text{C-H}_{\text{arom. (out of plane)}}$ ], 540 [ $\nu\text{Cu-O}$ ], 522 [ $\nu\text{P-C}$ ].

### 2.3. IR spectrum of **1a**

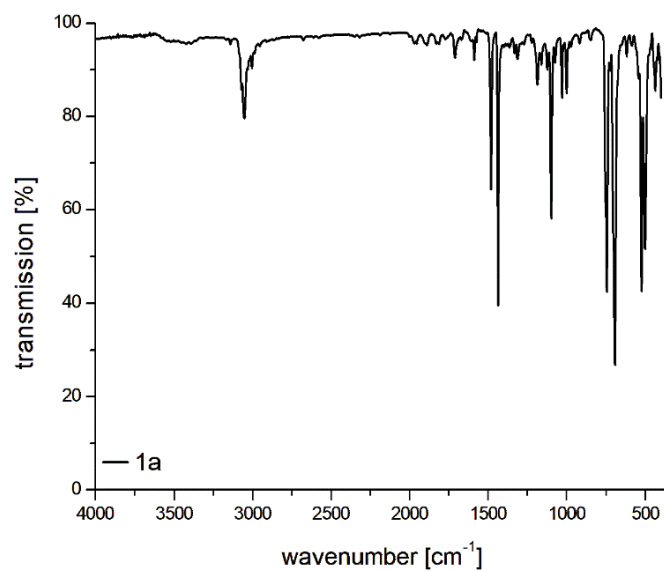

**Figure S9.** IR spectrum of **1a** ( $c = 1.54 \cdot 10^{-5}$  mol/g(KBr)).  $\tilde{\nu} = 3050$  [ $\nu\text{C-H}_{\text{arom.}}$ ], 1479-1434 [ $\nu\text{C-C}_{\text{arom.}}$ ], 1121, 1093 [ $\nu\text{C-H}_{\text{arom.}}$ ], 1027-996 [phenyl breathing mode], 744-694 [ $\delta\text{C-H}_{\text{arom. (out of plane)}}$ ], 542-501 [ $\nu\text{P-C}$ ].

### 2.4. IR spectrum of **1b**

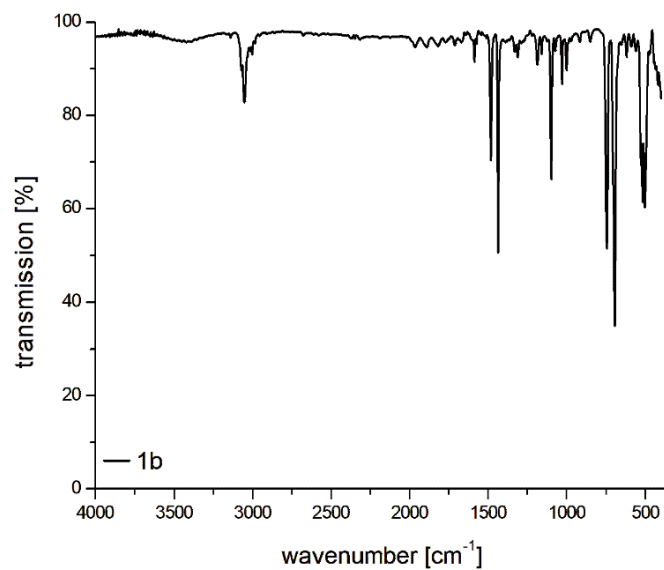

**Figure S10.** IR spectrum of **1b** ( $c = 0.99 \cdot 10^{-5} \text{ mol/g(KBr)}$ ).  $\tilde{\nu} = 3050$  [ $\nu\text{C-H}_{\text{arom.}}$ ], 1480-1434 [ $\nu\text{C-C}_{\text{arom.}}$ ], 1095 [ $\nu\text{C-H}_{\text{arom.}}$ ], 1027-996 [phenyl breathing mode], 744-694 [ $\delta\text{C-H}_{\text{arom. (out of plane)}}$ ], 527 [ $\nu\text{P-C}$ ].

## 2.5. IR spectrum of 1c

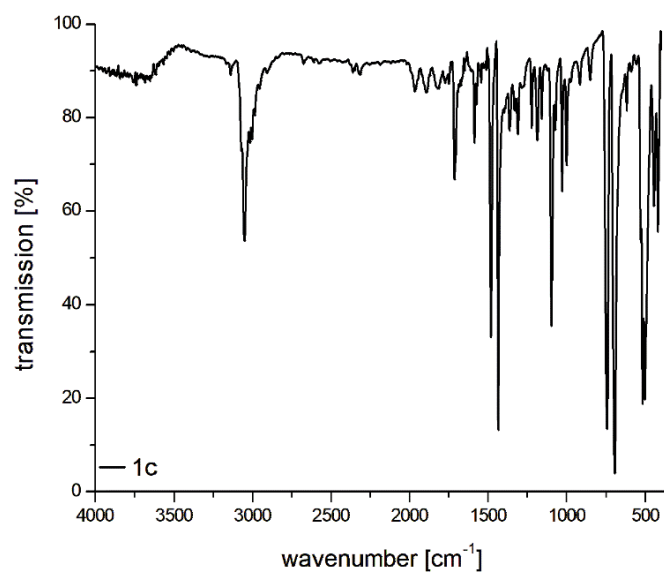

**Figure S11.** IR spectrum of **1c** ( $c = 1.28 \cdot 10^{-5} \text{ mol/g(KBr)}$ ).  $\tilde{\nu} = 3050$  [ $\nu\text{C-H}_{\text{arom.}}$ ], 1479-1433 [ $\nu\text{C-C}_{\text{arom.}}$ ], 1121, 1184, 1156, 1095 [ $\nu\text{C-H}_{\text{arom.}}$ ], 1027-997 [phenyl breathing mode], 742-694 [ $\delta\text{C-H}_{\text{arom. (out of plane)}}$ ], 527 [ $\nu\text{P-C}$ ].

## 2.6. IR spectrum of 2

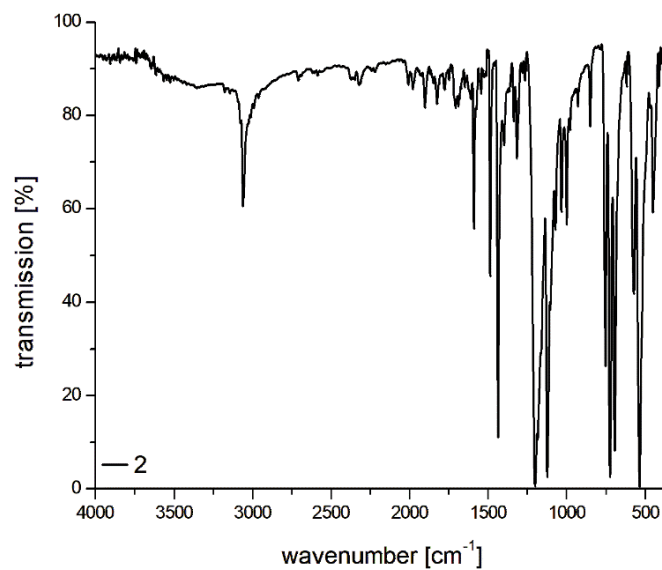

**Figure S12.** IR spectrum of **2** ( $c = 8.35 \cdot 10^{-5}$  mol/g(KBr)).  $\tilde{\nu} = 3050$  [ $\nu\text{C-H}_{\text{arom.}}$ ], 1480-1433 [ $\nu\text{C-C}_{\text{arom.}}$ ], 1198 [ $\nu\text{P-O}$ ], 1121-1095 [ $\nu\text{C-H}_{\text{arom.}}$ ], 1025-993 [phenyl breathing mode], 752, 723-694 [ $\delta\text{C-H}_{\text{arom. (out of plane)}}$ ], 572 [ $\nu\text{Cu-O}$ ], 536 [ $\nu\text{P-C}$ ].

## 2.7. IR spectrum of 2a

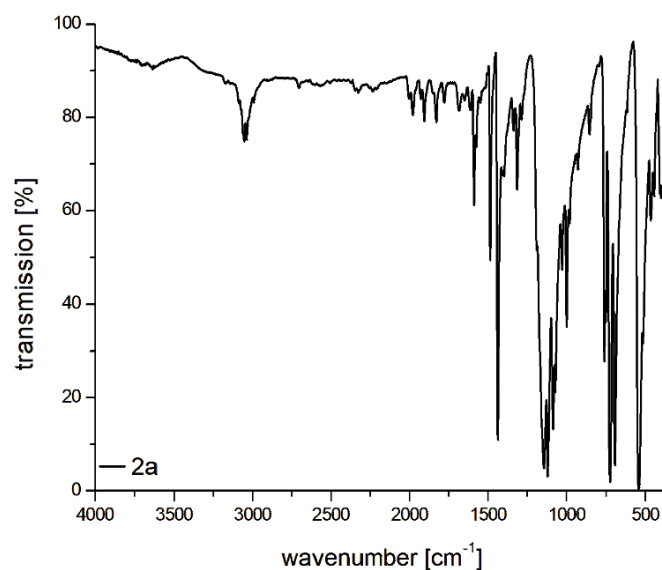

**Figure S13.** IR spectrum of **2a** ( $c = 2.54 \cdot 10^{-5}$  mol/g(KBr)).  $\tilde{\nu} = 3051\text{-}3036$  [ $\nu\text{C-H}_{\text{arom.}}$ ], 1483-1436 [ $\nu\text{C-C}_{\text{arom.}}$ ], 1336-1283, 1143 [ $\nu\text{P-O}$ ], 1117, 1083, 1068, [ $\delta\text{C-H}_{\text{arom. (in plane)}}$ ] 1026-996 [phenyl breathing mode], 759-750, 722-692 [ $\delta\text{C-H}_{\text{arom. (out of plane)}}$ ], 544 [ $\nu\text{P-C}$ ].

## 2.8. IR spectrum of 3

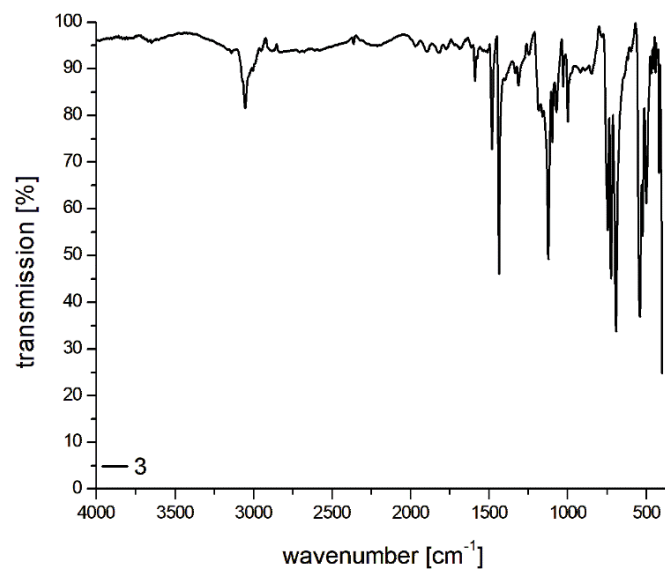

**Figure S14.** IR spectrum of **3** ( $c = 4.30 \cdot 10^{-3}$  mol/g(KBr)).  $\tilde{\nu} = 3052$  [ $\nu\text{C-H}_{\text{arom.}}$ ], 1475-1433 [ $\nu\text{C-C}_{\text{arom.}}$ ], 1120-1094 [ $\nu\text{C-H}_{\text{arom.}}$ ], 1026-997 [phenyl breathing mode], 745, 722-690 [ $\delta\text{C-H}_{\text{arom.}}$  (*out of plane*)], 542 [ $\nu\text{Cu-Cl}_4$ ], 523 [ $\nu\text{P-C}$ ].

## 2.9. Comparison of IR spectra

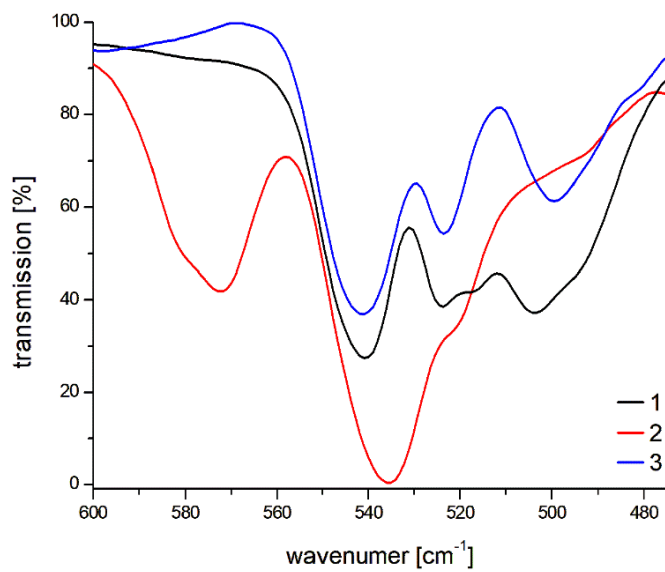

**Figure S15.** IR spectra of **1**, **2** and **3** (range 600-475  $\text{cm}^{-1}$ ).

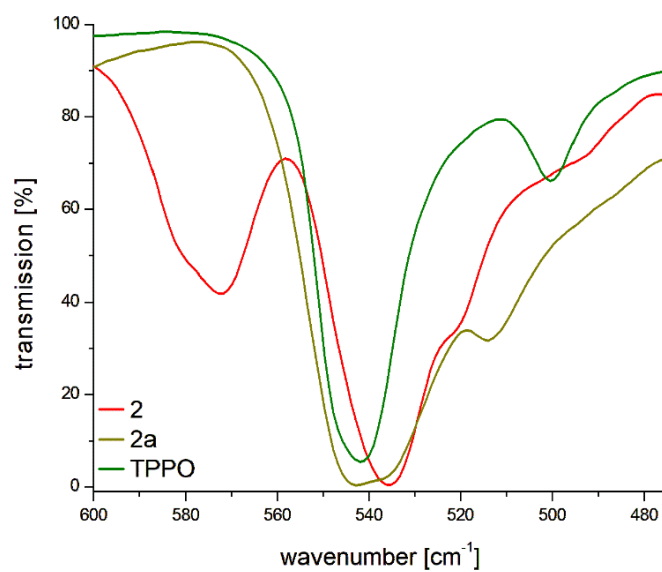

Figure S16. IR spectrum of 2, 2a, and TPPO (range 600-475  $\text{cm}^{-1}$ ).

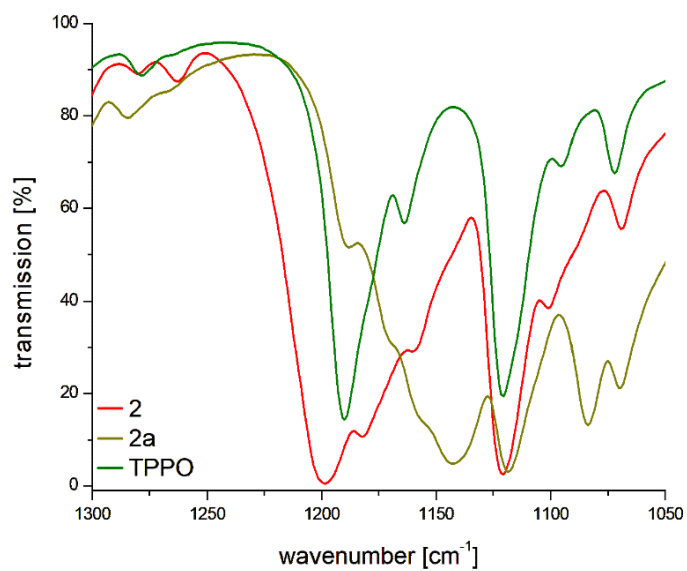

Figure S17. IR spectrum of 2, 2a, and TPPO (range 1300-1050  $\text{cm}^{-1}$ ).



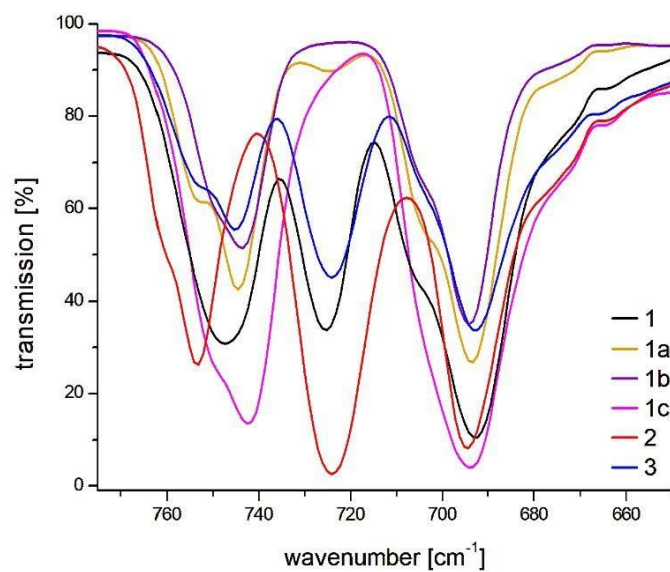

Figure S18. IR spectrum of 1, 1a, 1b, 1c, 2, and 3 (range 775-650  $\text{cm}^{-1}$ ).

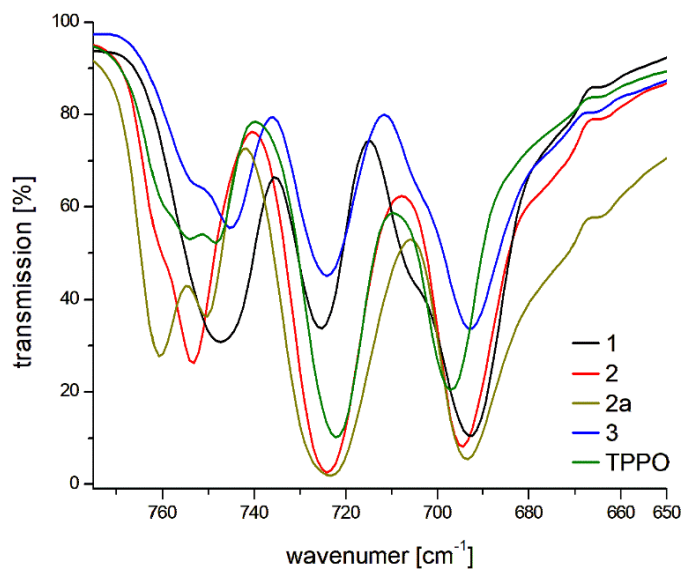

Figure S19. IR spectrum of 1, 2, 2a, 3, and TPPO (range 775-650  $\text{cm}^{-1}$ ).

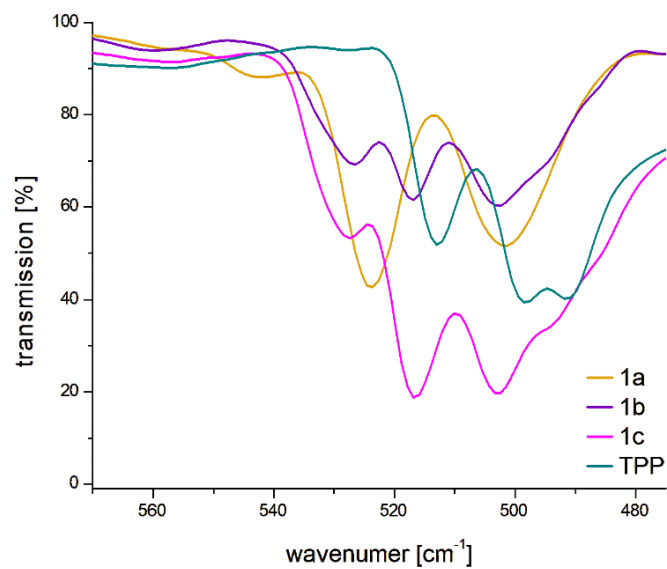

Figure S20. IR spectrum of **1a**, **1b**, **1c**, and **TPP** (range 570–475 cm<sup>-1</sup>).

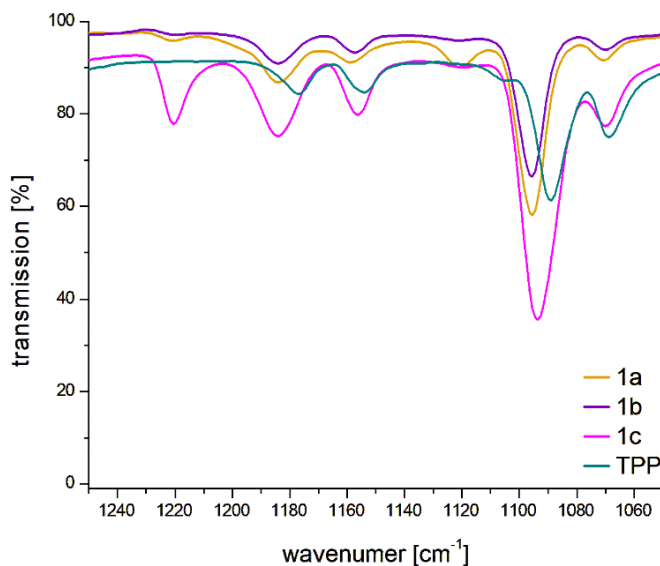

Figure S21. IR spectrum of **1a**, **1b**, **1c**, and **TPP** (range 570–475 cm<sup>-1</sup>).

### 3. Elemental analyses and melting points

#### 3.1. General Information

The measurements were performed in the analytical division of the organic chemistry department of the TUKaiserslautern. The measurements were performed on an Elementar Analysensysteme vario MICRO cube device.

The melting points were measured with a DigiMelt MPA161 SRS SI Scientific Instruments GmbH instrument.

#### 3.2. Elemental analyses

Table S15. Elemental analysis of **1**, **1a**, **1b**, **1c**, **2**, **2a** and **3**.

|           |                                         | Carbon / % | Hydrogen / % | Nitrogen / % |
|-----------|-----------------------------------------|------------|--------------|--------------|
| <b>1</b>  | Calculated                              | 56.45      | 3.95         | –            |
|           | Measurement                             | 56.08      | 4.05         | –            |
| <b>1a</b> | Calculated                              | 59.84      | 4.18         | –            |
|           | Measurement                             | 58.67      | 4.03         | –            |
| <b>1b</b> | Calculated                              | 69.34      | 4.85         | –            |
|           | Calculated <b>1b</b> ·2H <sub>2</sub> O | 65.55      | 5.20         | –            |
|           | Measurement                             | 65.61      | 4.56         | –            |
| <b>1c</b> | Calculated                              | 73.22      | 5.12         | –            |
|           | Calculated <b>1c</b> ·1.5 acetone       | 72.21      | 5.59         | –            |
|           | Measurement                             | 72.03      | 5.38         | –            |
| <b>2</b>  | Calculated                              | 54.18      | 3.79         | –            |
|           | Measurement                             | 54.00      | 3.89         | –            |

|           |             |              |             |   |
|-----------|-------------|--------------|-------------|---|
| <b>2a</b> | Calculated  | <b>62.57</b> | <b>4.38</b> | – |
|           | Measurement | <b>62.61</b> | <b>4.22</b> | – |
| <b>3</b>  | Calculated  | <b>59.84</b> | <b>4.18</b> | – |
|           | Measurement | <b>59.95</b> | <b>4.35</b> | – |

### 3.3. Melting points

**Table S16.** Melting points of **1a**, **1b**, **1c**, **2**, and **2a**.

|                    | <b>1a</b> | <b>1b</b> | <b>1c</b> | <b>2</b>  | <b>2a</b>   |
|--------------------|-----------|-----------|-----------|-----------|-------------|
| Melting point / °C | 160-168   | 236-240.5 | 168-175   | 255-258.8 | 164.9-174.1 |

## 4. References

1. Krause, L.; Herbst-Irmer, R.; Sheldrick, G. M.; Stalke, D. Comparison of silver and molybdenum microfocus X-ray sources for single-crystal structure determination. *J. Appl. Crystallogr.* **2015**, *48*, 3–10
2. APEX2, version 2, Bruker AXS, Inc.: Madison, WI, USA, 2007.
3. XPREP, Bruker AXS, Inc.: Madison, WI, USA, 2014.
4. Sheldrick, G.M. SHELXT-Integrated space-group and crystal-structure determination *Acta Crystallogr. A Found. Adv.* **2015**, *71*, 3–8, doi: <https://doi.org/10.1107/S2053273314026370>
5. Sheldrick, G. M. Crystal structure refinement with SHELXL. *Acta Crystallogr. C Struct. Chem.* **2015**, *71*, 3–8, doi: <https://doi.org/10.1107/S2053229614024218>
6. Hübschle, C.B.; Sheldrick, G.M.; Dittrich, B. ShelXle: a Qt graphical user interface for SHELXL. *J. Appl. Crystallogr.* **2011**, *44*, 1281–1284, doi: <https://doi.org/10.1107/s0021889811043202>.
7. PLATON, Multipurpose Crystallographic Tool, Spek, A.L. University of Utrecht: Utrecht, The Netherlands, 2008.
